# Supplementary material for: Systematic analysis of genes involved in oral cancer metastasis to lymph nodes
Source: Cell Mol Biol Lett. 2018 Nov 15;23:53. doi: 10.1186/s11658-018-0120-2 (PMC6237046; doi:10.1186/s11658-018-0120-2)
Supplement: Supplementary file 8 — Table S8. Opposite Overlapping DEGs. (XLSX 13 kb) [file 11658_2018_120_MOESM8_ESM.xlsx]

## Sheet: Sheet1
Table 8. Opposite Overlapping DEGs
Overlapping genes	GSE2280	GSE70604
CIC	0.557589	-1.35582
PSTPIP1	0.494057	-1.69209
CACNA1I	0.569673	-1.66877
NOD1	0.528951	-1.82005
FOXO1	0.665482	-1.50749
SH2B2	0.57555	-1.75671
CD6	0.587913	-1.74286
PLCG2	0.529946	-1.97229
KIAA0922	0.796929	-1.38602
SLC25A10	-0.63199	1.77185
MRPL42	-0.65083	2.20214
YES1	-0.81037	1.76937
C9orf3	-1.00934	1.42184
CD83	0.576061	-2.53873
HRAS	-0.82796	1.84168
IL16	0.528115	-2.91137
CLEC4M	0.843158	-1.85115
KLHL3	0.861867	-1.84552
STAG3	0.538551	-2.99065
CYSLTR1	0.823895	-2.02014
FAM117A	0.669941	-2.48726
EVL	1.0044	-1.69494
LBH	0.83891	-2.06363
IL10RA	0.861178	-2.07407
ADAM19	0.787617	-2.28857
PTPN6	0.751978	-2.40782
PAK6	-0.91885	2.15173
F12	-0.7908	2.58029
SKAP1	0.794033	-2.68968
ARHGAP25	0.830938	-2.61181
DENND1C	0.715698	-3.06439
CD28	0.826981	-2.65597
EMP2	-0.91055	2.43731
INPP5D	0.881807	-2.56195
CD3E	0.61203	-3.6983
RAC2	0.817427	-2.8072
CEACAM21	0.975081	-2.37238
IRF8	1.01609	-2.43661
BTK	0.851388	-2.98516
PVRIG	0.849033	-3.0107
ADGRG2	1.2162	-2.11364
TCL1A	0.63374	-4.13664
TCF7	0.663458	-4.21657
CSTB	-0.91074	3.12229
PRKCB	1.00593	-2.8542
FAM65B	0.763255	-4.07785
TRIM29	-1.06219	2.95647
ANXA1	-1.03609	3.05703
PHLDA2	-0.93943	3.44223
PTK6	-1.64327	1.98022
ITGAL	1.28605	-2.60234
CD53	0.940578	-3.84322
KCNK1	-0.99749	3.82584
CETP	1.00615	-3.80606
SP140	1.48237	-2.60923
LY9	1.19812	-3.30565
CD48	1.03581	-3.83852
ENPP2	1.13459	-3.53872
FCMR	1.21707	-3.37065
CD19	1.23813	-3.35588
ECM1	-0.9826	4.33117
MPZL2	-1.44811	3.0244
LTB	1.11756	-4.00828
IGFBP2	-1.37526	3.33099
RAPGEFL1	-2.31854	2.05745
CCR7	1.34927	-3.54945
TNNI1	-3.2797	1.46402
FCRL2	1.34557	-3.70516
UBASH3A	1.62457	-3.17277
VSNL1	-1.30626	4.09705
SERPINB2	-2.60132	2.20099
EPCAM	-1.64482	3.55145
GPR18	1.63228	-4.02359
ADH7	-1.83013	3.81469
CD37	1.79663	-4.17079
BANK1	1.73399	-4.36382
CCL19	1.72999	-4.65109
TGM1	-2.46391	3.40884
CD79B	1.89564	-4.61781
FGFBP1	-1.78001	5.10408
CD72	2.15487	-4.47918
DSC3	-1.50007	6.7474
MS4A1	2.02914	-5.43577
CR2	2.26404	-5.85165
AKR1B10	-2.26339	5.86838
C7	4.86304	-4.38344
